# Supplementary material
Source: publisher figshare collection journal article supplement (https://f1000.figshare.com/articles/dataset/_/106728)
Supplement: Supplementary file 1 [file 1]

| Table format:<br>Column |          | Group A | Group B | Group C | Group D | Group E | Group F | Group G | Group H |
|-------------------------|----------|---------|---------|---------|---------|---------|---------|---------|---------|
|                         |          |         |         |         |         |         |         |         |         |
|                         |          | Y       | Y       | Y       | Y       | Y       | Y       | Y       | Y       |
| 1                       | 2334.627 | 2715    | 1618679 | 147326  | 366936  | 343434  | 209486  | 292440  | 108284  |
| 2                       | 2081.865 | 10880   | 1053345 | 119011  | 79039   | 86849   | 265296  | 170582  | 238230  |
| 3                       | Title    | 3164    | 2900579 | 172962  | 830822  | 803226  | 245949  | 343351  | 127121  |
| 4                       | Title    | 12752   | 1236781 | 139716  | 92782   | 101953  | 311479  | 200269  | 279699  |
| 5                       | Title    | 10250   | 991115  | 111992  | 74381   | 81730   | 249632  | 160515  | 224166  |
| 6                       | Title    | 2193    | 1311409 | 119353  | 297277  | 278236  | 169714  | 236921  | 87723   |
| 7                       | Title    | 8808    | 853389  | 96414   | 64029   | 70357   | 214930  | 138195  | 193002  |
| 8                       | Title    | 7082    | 683879  | 77284   | 51333   | 56403   | 172256  | 110765  | 154684  |

|   | Group I | Group J |
|---|---------|---------|
|   |         |         |
|   | Y       | Y       |
| 1 | 196932  | 334387  |
| 2 | 156043  | 245163  |
| 3 | 231208  | 392603  |
| 4 | 183197  | 287840  |
| 5 | 146835  | 230689  |
| 6 | 159543  | 270906  |
| 7 | 126416  | 198619  |
| 8 | 101326  | 159185  |
