# Supplementary material
Source: publisher figshare collection journal article supplement (https://f1000.figshare.com/articles/dataset/_/106728)
Supplement: Supplementary file 3 [file 1]

| Table format:<br>Column |          | Group A | Group B | Group C | Group D | Group E | Group F | Group G | Group H |
|-------------------------|----------|---------|---------|---------|---------|---------|---------|---------|---------|
|                         |          |         |         |         |         |         |         |         |         |
|                         |          | Y       | Y       | Y       | Y       | Y       | Y       | Y       | Y       |
| 1                       | 2334.627 | 2272    | 465512  | 48542   | 84892   | 96020   | 89145   | 99151   | 108600  |
| 2                       | 2081.865 | 2557    | 614864  | 71191   | 94997   | 68579   | 55264   | 74330   | 157881  |
| 3                       | Title    | 2644    | 446566  | 56973   | 99655   | 112721  | 104648  | 116396  | 127492  |
| 4                       | Title    | 2979    | 721931  | 83568   | 111519  | 80501   | 64866   | 87253   | 155356  |
| 5                       | Title    | 2419    | 878544  | 66998   | 89396   | 64540   | 52011   | 69951   | 108565  |
| 6                       | Title    | 1834    | 377140  | 39321   | 68771   | 77787   | 72216   | 80323   | 87979   |
| 7                       | Title    | 2065    | 498142  | 57671   | 76958   | 55555   | 44767   | 60214   | 107905  |
| 8                       | Title    | 1678    | 399205  | 46238   | 61693   | 44542   | 35897   | 48276   | 72519   |

|   | Group I | Group J |
|---|---------|---------|
|   |         |         |
|   | Y       | Y       |
| 1 | 100090  | 155211  |
| 2 | 109637  | 123454  |
| 3 | 87499   | 152221  |
| 4 | 222643  | 144933  |
| 5 | 78444   | 116172  |
| 6 | 81084   | 125742  |
| 7 | 53633   | 100013  |
| 8 | 183136  | 80168   |
