# Supplementary material
Source: publisher figshare collection journal article supplement (https://f1000.figshare.com/articles/dataset/_/106728)
Supplement: Supplementary file 4 [file 1]

| Table format:<br>Column |          | Group A | Group B | Group C | Group D | Group E | Group F | Group G | Group H |
|-------------------------|----------|---------|---------|---------|---------|---------|---------|---------|---------|
|                         |          |         |         |         |         |         |         |         |         |
|                         |          | Y       | Y       | Y       | Y       | Y       | Y       | Y       | Y       |
| 1                       | 2334.627 | 2335    | 484517  | 31180   | 36100   | 27058   | 24081   | 23560   | 43851   |
| 2                       | 2081.865 | 2082    | 608296  | 47178   | 52526   | 102583  | 65844   | 66462   | 99463   |
| 3                       | Title    | 2718    | 568881  | 36588   | 42364   | 31747   | 28252   | 27640   | 51465   |
| 4                       | Title    | 2421    | 714219  | 55372   | 61652   | 120426  | 77289   | 78014   | 116763  |
| 5                       | Title    | 1972    | 572364  | 44403   | 49435   | 96534   | 61966   | 62548   | 93598   |
| 6                       | Title    | 1885    | 692537  | 25255   | 29241   | 21915   | 19503   | 19081   | 35521   |
| 7                       | Title    | 1680    | 492821  | 38216   | 42549   | 83104   | 53339   | 53839   | 80576   |
| 8                       | Title    | 1370    | 394941  | 30648   | 34120   | 66618   | 42766   | 43167   | 64592   |

|   | Group I | Group J |
|---|---------|---------|
|   |         |         |
|   | Y       | Y       |
| 1 | 34248   | 117814  |
| 2 | 76593   | 59042   |
| 3 | 40190   | 138310  |
| 4 | 89910   | 69302   |
| 5 | 72080   | 55566   |
| 6 | 27741   | 95443   |
| 7 | 62048   | 47828   |
| 8 | 49745   | 38350   |
