# Supplementary material
Source: publisher figshare collection journal article supplement (https://f1000.figshare.com/articles/dataset/_/106728)
Supplement: Supplementary file 6 [file 1]

| Table format:<br>Column |          | Group A | Group B | Group C | Group D | Group E | Group F | Group G | Group H |
|-------------------------|----------|---------|---------|---------|---------|---------|---------|---------|---------|
|                         |          |         |         |         |         |         |         |         |         |
|                         |          | Y       | Y       | Y       | Y       | Y       | Y       | Y       | Y       |
| 1                       | 2334.627 | 3209    | 462880  | 73510   | 94298   | 54238   | 70637   | 91118   | 177670  |
| 2                       | 2081.865 | 2203    | 457227  | 58538   | 108691  | 67240   | 145131  | 134719  | 90577   |
| 3                       | Title    | 3745    | 443476  | 86290   | 110699  | 63662   | 82917   | 106965  | 208591  |
| 4                       | Title    | 2564    | 1606506 | 68711   | 127598  | 78928   | 170385  | 158160  | 106329  |
| 5                       | Title    | 2086    | 406586  | 55092   | 102281  | 63279   | 136568  | 126771  | 85237   |
| 6                       | Title    | 2594    | 475008  | 59550   | 76392   | 43936   | 57222   | 73815   | 143938  |
| 7                       | Title    | 1779    | 394499  | 47420   | 88052   | 54470   | 117575  | 109140  | 73377   |
| 8                       | Title    | 1449    | 1256554 | 38023   | 70583   | 43672   | 94241   | 87482   | 58823   |

|   | Group I | Group J |
|---|---------|---------|
|   |         |         |
|   | Y       | Y       |
| 1 | 147021  | 121559  |
| 2 | 104798  | 217190  |
| 3 | 172604  | 142707  |
| 4 | 123027  | 254994  |
| 5 | 98618   | 204369  |
| 6 | 119107  | 98478   |
| 7 | 84898   | 175955  |
| 8 | 68056   | 141024  |
